# Supplementary material for: Enhanced catalytic activity over palladium supported on ZrO2@C with NaOH-assisted reduction for decomposition of formic acid
Source: Royal Society of Chemistry journal article supplement (doi:10.1039/c8ra10198a), 2019-01-01
Supplement: c8ra10198a1.pdf [file c8ra10198a1.pdf]

## Supporting Information

### **Enhanced catalytic activity over palladium supported on ZrO<sub>2</sub>@C with NaOH-assisted reduction for decomposition of formic acid**

Tong Wang, Fang Li, Hualiang An, Wei Xue \*, Yanji Wang \*

Hebei Provincial Key Lab of Green Chemical Technology and High Efficient Energy Saving,  
School of Chemical Engineering and Technology, Hebei University of Technology, Tianjin  
300130, China

Correspondence: Wei Xue, Yanji Wang, Hebei University of Technology, Tianjin 300130, P.  
R. China.

Tel.: +86-22-60200445

E-mail: weixue@hebut.edu.cn

yjwang@hebut.edu.cn

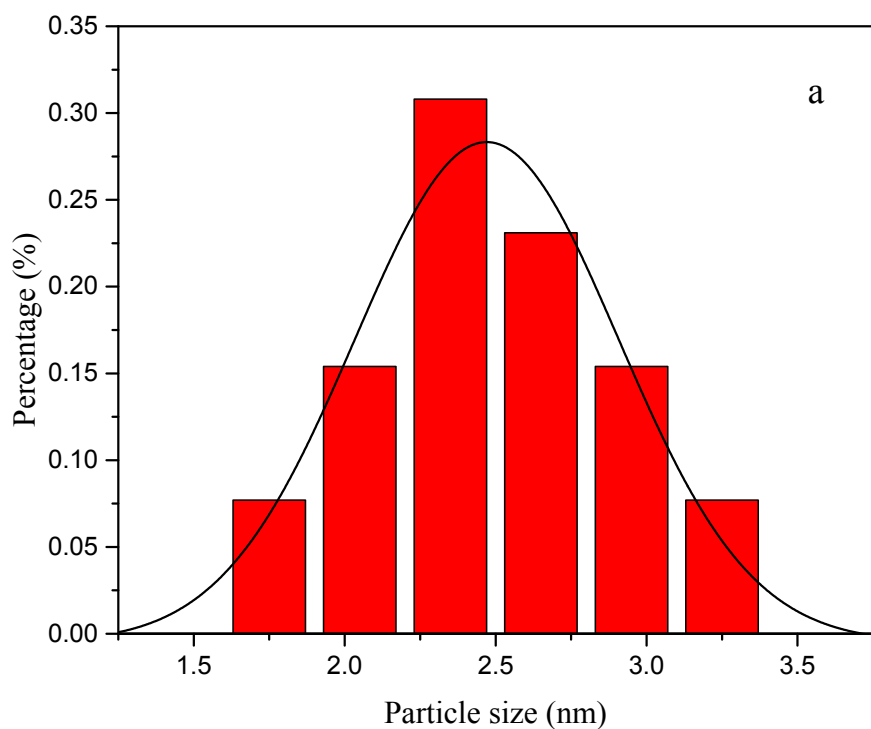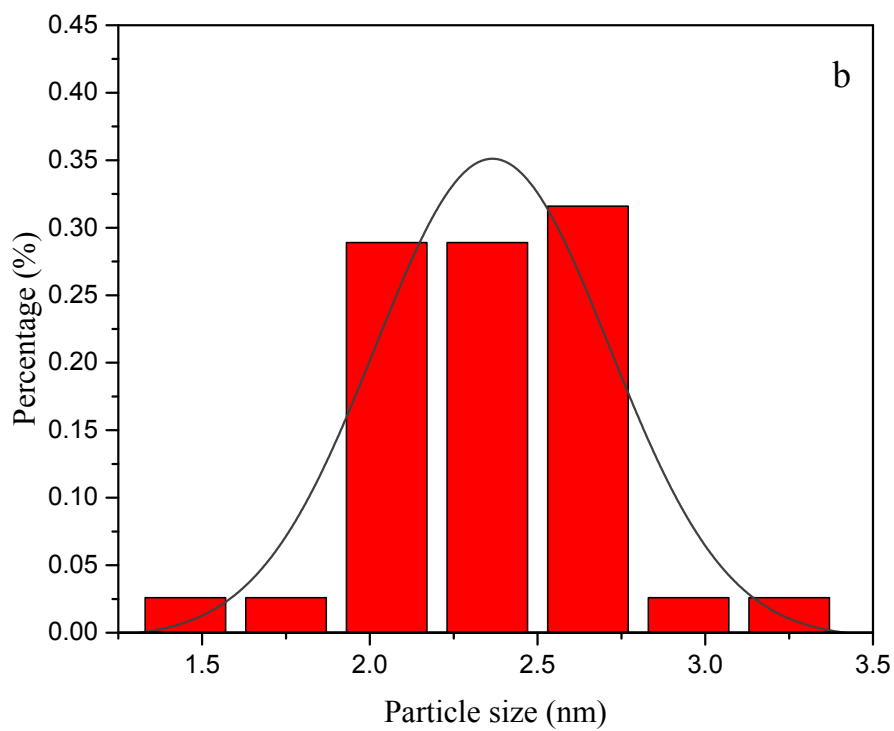

**Fig S1** The corresponding size distribution of Pd NPs of (a) Pd/ZrO<sub>2</sub>@C and (b) Pd/AC

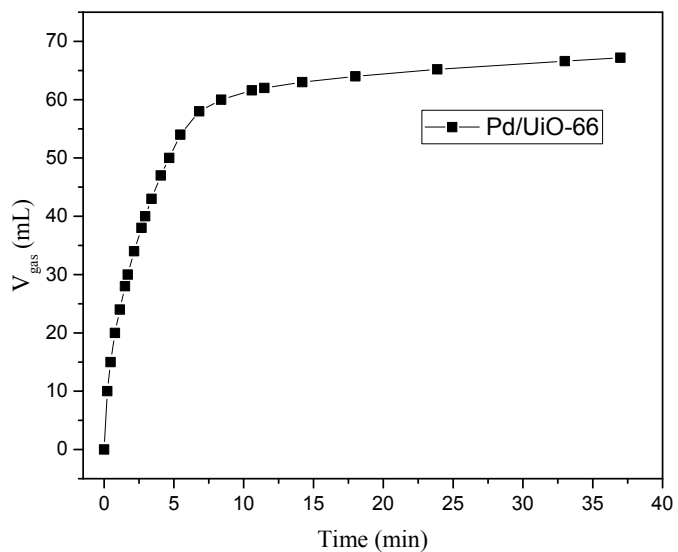

**Fig S2** Gas generation of Pd/Uio-66 for the decomposition of FA-SF (1:3) mixture at 50 °C ( $n_{\text{FA}} = 1.5 \text{ mmol}$ ,  $n_{\text{metal}}:n_{\text{FA}} = 0.01$ )

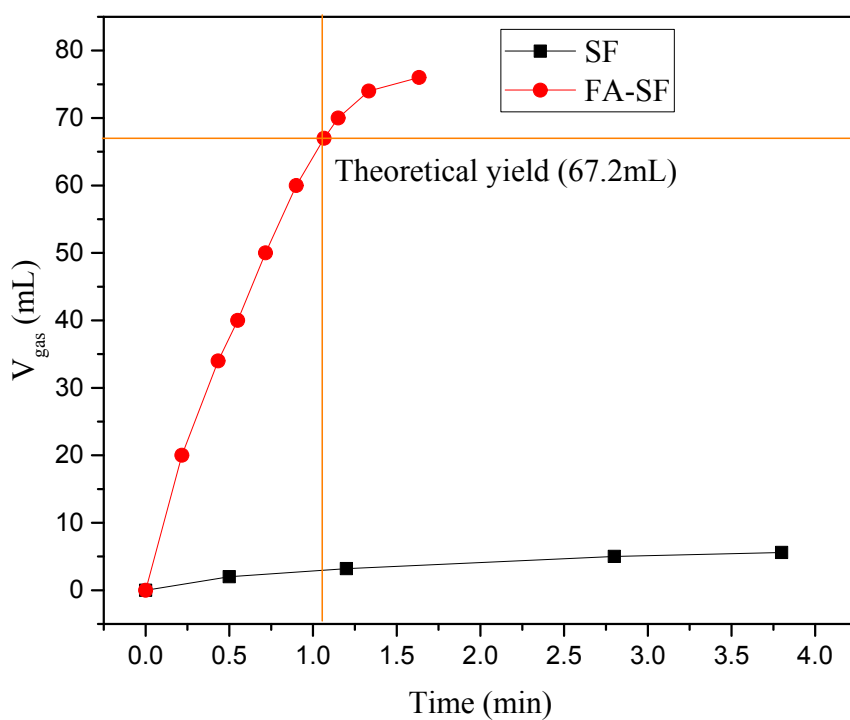

**Fig S3** Gas generation of Pd/ZrO<sub>2</sub>@C catalyst for decomposition of SF solution and mixture of FA-SF (1:3) at 50° C. ( $n_{\text{FA}} = 1.5 \text{ mmol}$ ,  $n_{\text{metal}}:n_{\text{FA}} = 0.01$ )

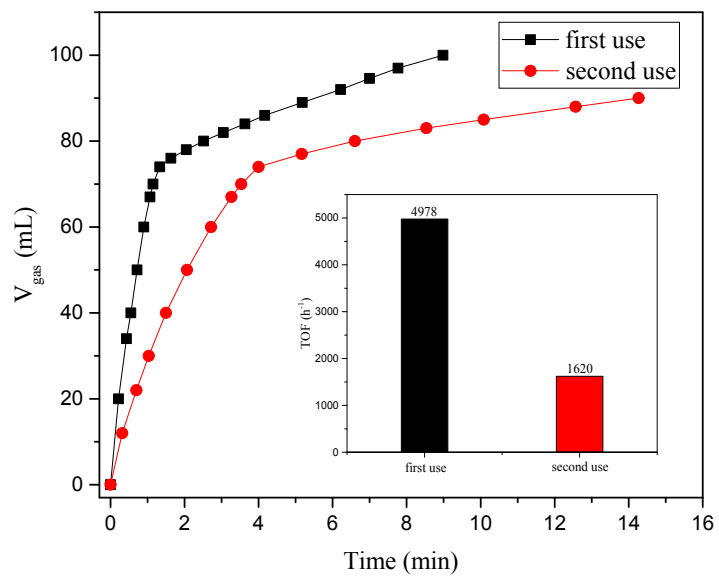

**Fig S4** Recycle test of Pd/ZrO<sub>2</sub>@C catalyst toward H<sub>2</sub> generation from FA/SF solution at 50° C. ( $n_{\text{FA}} = 1.5 \text{ mmol}$ ,  $n_{\text{FA}} : n_{\text{SF}} = 1 : 3$ ,  $n_{\text{Pd}} : n_{\text{FA}} = 0.01$ )

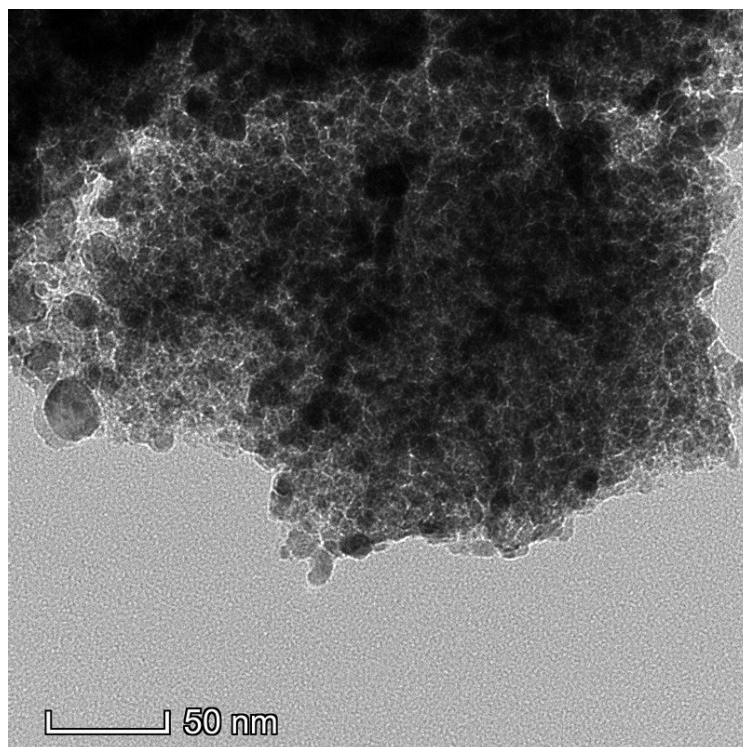

**Fig S5** TEM images of Pd/ZrO<sub>2</sub>@C catalyst after catalysis
